# Supplementary material for: An investigation of free-energy-averaged (coarse-grained) potentials for fluid adsorption on heterogeneous solid surfaces
Source: Royal Society of Chemistry journal article supplement (doi:10.1039/c9cp02601k), 2019-01-01
Supplement: c9cp02601k1.pdf [file c9cp02601k1.pdf]

# An investigation of free-energy-averaged (coarse-grained) potentials for fluid adsorption on heterogeneous solid surfaces

May 8, 2019

## Supplementary Information

The following Chebyshev polynomial form is used to fit the discrete free-energy-averaged (FEA) fluid–solid potential

$$\beta\mathcal{W}^{\text{fit}}(D) = \sum_{i=0}^n c_i T_i(D') \quad (1)$$

where  $n + 1$  is the number of coefficients used in the polynomial.  $c_i$  is the  $i^{\text{th}}$  Chebyshev coefficient and  $D'$  is the scaled version, always in the range  $[-1, 1]$ , of the distance  $D$

$$D' = \frac{D - 0.5(D_{\text{max}} + D_{\text{min}})}{0.5(D_{\text{max}} - D_{\text{min}})} \quad (2)$$

$T_i$  is the  $i^{\text{th}}$  Chebyshev polynomial term given by following recurrence relation

$$\begin{aligned} T_0 &= 1 \\ T_1(x) &= x \\ T_{i+2}(x) &= 2xT_{i+1}(x) - T_i(x) \end{aligned} \quad (3)$$

$D_{\text{min}}$  and  $D_{\text{max}}$  are the minimum and maximum limits considered for fluid–solid distance in the free-energy-averaged (FEA) potential. The coefficients  $c_i$  are obtained using orthogonality condition of Chebyshev polynomials and are provided in the following tables.

Table 1: Chebyshev polynomial coefficients to approximate FEA potential of methane interacting with graphite containing homogeneous graphene surface layer

| $c_1 - c_{26}$ | $c_{27} - c_{52}$ | $c_{53} - c_{78}$ | $c_{79} - c_{104}$ | $c_{105} - c_{130}$ | $c_{131} - c_{151}$ |
|----------------|-------------------|-------------------|--------------------|---------------------|---------------------|
| -0.508259      | 0.000202          | 0.000092          | -0.000129          | 0.000171            | -0.000005           |
| 0.378714       | -0.000204         | -0.000094         | 0.000068           | -0.000201           | -0.000039           |
| 0.802759       | 0.000099          | 0.000107          | -0.000008          | 0.000198            | 0.000067            |
| -1.574446      | 0.000067          | -0.000107         | -0.000038          | -0.000160           | -0.000076           |
| 1.766786       | -0.000107         | 0.000079          | 0.000072           | 0.000083            | 0.000071            |
| -1.571205      | 0.000155          | -0.000049         | -0.000093          | 0.000011            | -0.000053           |
| 1.219075       | -0.000267         | 0.000018          | 0.000097           | -0.000106           | 0.000029            |
| -0.856367      | 0.000231          | 0.000041          | -0.000089          | 0.000181            | -0.000004           |
| 0.553093       | -0.000063         | -0.000113         | 0.000081           | -0.000221           | -0.000018           |
| -0.332628      | -0.000014         | 0.000158          | -0.000070          | 0.000214            | 0.000037            |
| 0.187118       | 0.000039          | -0.000181         | 0.000059           | -0.000164           | -0.000045           |
| -0.096404      | -0.000109         | 0.000176          | -0.000053          | 0.000082            | 0.000044            |
| 0.043450       | 0.000131          | -0.000128         | 0.000048           | 0.000015            | -0.000033           |
| -0.015510      | -0.000077         | 0.000042          | -0.000033          | -0.000111           | 0.000015            |
| 0.001819       | 0.000069          | 0.000046          | 0.000011           | 0.000180            | 0.000009            |
| 0.004190       | -0.000062         | -0.000127         | 0.000014           | -0.000210           | -0.000031           |
| -0.005461      | -0.000026         | 0.000188          | -0.000046          | 0.000199            | 0.000049            |
| 0.004554       | 0.000110          | -0.000212         | 0.000085           | -0.000148           | -0.000059           |
| -0.003571      | -0.000110         | 0.000187          | -0.000114          | 0.000069            | 0.000058            |
| 0.002589       | 0.000102          | -0.000130         | 0.000138           | 0.000014            | -0.000047           |
| -0.001445      | -0.000093         | 0.000051          | -0.000148          | -0.000087           | 0.000027            |
| 0.000623       | 0.000040          | 0.000039          | 0.000135           | 0.000136            |                     |
| -0.000181      | 0.000008          | -0.000121         | -0.000093          | -0.000153           |                     |
| -0.000287      | -0.000008         | 0.000171          | 0.000033           | 0.000141            |                     |
| 0.000535       | 0.000023          | -0.000187         | 0.000038           | -0.000105           |                     |
| -0.000370      | -0.000067         | 0.000172          | -0.000112          | 0.000057            |                     |

Table 2: Chebyshev polynomial coefficients to approximate FEA potential of methane interacting with graphite that contains chemical heterogeneities in the surface graphene layer

| $c_1 - c_{26}$ | $c_{27} - c_{52}$ | $c_{53} - c_{78}$ | $c_{79} - c_{104}$ | $c_{105} - c_{130}$ | $c_{131} - c_{151}$ |
|----------------|-------------------|-------------------|--------------------|---------------------|---------------------|
| -1.070652      | 0.006332          | -0.000204         | -0.000115          | 0.000191            | -0.000138           |
| 1.398279       | -0.004102         | 0.000238          | 0.000041           | -0.000160           | 0.000137            |
| 0.224479       | 0.001846          | -0.000167         | 0.000028           | 0.000101            | -0.000113           |
| -1.600873      | 0.000215          | 0.000180          | -0.000076          | -0.000027           | 0.000071            |
| 2.164310       | -0.001839         | -0.000128         | 0.000146           | -0.000037           | -0.000015           |
| -2.054791      | 0.002090          | 0.000023          | -0.000186          | 0.000090            | -0.000040           |
| 1.610753       | -0.001605         | -0.000070         | 0.000170           | -0.000136           | 0.000088            |
| -1.086480      | 0.001031          | 0.000097          | -0.000160          | 0.000166            | -0.000130           |
| 0.649661       | 0.000021          | 0.000026          | 0.000142           | -0.000177           | 0.000159            |
| -0.367744      | -0.000903         | -0.000080         | -0.000073          | 0.000175            | -0.000171           |
| 0.217179       | 0.000872          | 0.000082          | -0.000009          | -0.000156           | 0.000173            |
| -0.153616      | -0.000659         | -0.000183         | 0.000085           | 0.000123            | -0.000160           |
| 0.137930       | 0.000526          | 0.000242          | -0.000172          | -0.000088           | 0.000127            |
| -0.130507      | 0.000008          | -0.000207         | 0.000239           | 0.000052            | -0.000085           |
| 0.110932       | -0.000506         | 0.000211          | -0.000264          | -0.000007           | 0.000050            |
| -0.081859      | 0.000576          | -0.000204         | 0.000269           | -0.000039           | -0.000025           |
| 0.048201       | -0.000613         | 0.000156          | -0.000241          | 0.000078            | 0.000010            |
| -0.014973      | 0.000548          | -0.000182         | 0.000167           | -0.000111           | 0.000000            |
| -0.009218      | -0.000235         | 0.000201          | -0.000088          | 0.000126            | -0.000009           |
| 0.021486       | 0.000110          | -0.000108         | 0.000026           | -0.000114           | 0.000013            |
| -0.024431      | -0.000115         | 0.000032          | 0.000038           | 0.000085            | -0.000009           |
| 0.019550       | -0.000086         | -0.000005         | -0.000095          | -0.000046           |                     |
| -0.010521      | 0.000149          | -0.000071         | 0.000132           | -0.000001           |                     |
| 0.002732       | 0.000048          | 0.000135          | -0.000164          | 0.000042            |                     |
| 0.002729       | -0.000093         | -0.000130         | 0.000193           | -0.000076           |                     |
| -0.006189      | 0.000073          | 0.000128          | -0.000202          | 0.000112            |                     |

Table 3: Chebyshev polynomial coefficients to approximate FEA potential of methane interacting with graphite that contains geometric heterogeneities (vacancies) in the surface graphene layer

| $c_1 - c_{26}$ | $c_{27} - c_{52}$ | $c_{53} - c_{78}$ | $c_{79} - c_{104}$ | $c_{105} - c_{130}$ | $c_{131} - c_{151}$ |
|----------------|-------------------|-------------------|--------------------|---------------------|---------------------|
| 0.677863       | -0.000564         | 0.010054          | 0.005812           | 0.001174            | 0.000084            |
| -1.631478      | -0.037636         | -0.001700         | -0.001328          | -0.000723           | -0.000163           |
| 2.002336       | 0.034727          | -0.007564         | -0.003775          | -0.000388           | 0.000157            |
| -1.775072      | -0.002578         | 0.009157          | 0.005302           | 0.001249            | -0.000045           |
| 0.991006       | -0.025136         | -0.001649         | -0.002334          | -0.001258           | -0.000081           |
| -0.319527      | 0.025623          | -0.008020         | -0.002291          | 0.000506            | 0.000101            |
| 0.240559       | -0.003728         | 0.011205          | 0.004629           | 0.000391            | 0.000037            |
| -0.627857      | -0.016842         | -0.005140         | -0.002971          | -0.000816           | -0.000262           |
| 0.995743       | 0.017966          | -0.005017         | -0.001070          | 0.000590            | 0.000417            |
| -0.978421      | -0.002574         | 0.010590          | 0.004165           | -0.000023           | -0.000376           |
| 0.604880       | -0.012142         | -0.006891         | -0.003984          | -0.000377           | 0.000145            |
| -0.188305      | 0.012733          | -0.002671         | 0.000988           | 0.000293            | 0.000134            |
| 0.002222       | -0.001048         | 0.009827          | 0.002176           | 0.000180            | -0.000273           |
| -0.072628      | -0.009750         | -0.008678         | -0.003079          | -0.000660           | 0.000161            |
| 0.219678       | 0.009500          | 0.000532          | 0.001398           | 0.000803            | 0.000139            |
| -0.250606      | -0.000175         | 0.007499          | 0.001153           | -0.000524           | -0.000430           |
| 0.125159       | -0.007828         | -0.008818         | -0.002420          | 0.000013            | 0.000519            |
| 0.042260       | 0.006291          | 0.002827          | 0.001550           | 0.000406            | -0.000355           |
| -0.117349      | 0.002894          | 0.005067          | 0.000506           | -0.000497           | 0.000063            |
| 0.065538       | -0.009805         | -0.008219         | -0.001969          | 0.000260            | 0.000153            |
| 0.039738       | 0.007029          | 0.004262          | 0.001700           | 0.000097            | -0.000160           |
| -0.097534      | 0.002981          | 0.003079          | -0.000041          | -0.000341           |                     |
| 0.067514       | -0.010879         | -0.007544         | -0.001574          | 0.000365            |                     |
| 0.008809       | 0.009281          | 0.005760          | 0.001918           | -0.000228           |                     |
| -0.060027      | 0.000512          | 0.000359          | -0.000917          | 0.000075            |                     |
| 0.049965       | -0.009655         | -0.005587         | -0.000483          | -0.000024           |                     |

Table 4: Chebyshev polynomial coefficients to approximate FEA potential of methane interacting with graphite that contains both chemical and geometric heterogeneities in the surface graphene layer

| $c_1 - c_{26}$ | $c_{27} - c_{52}$ | $c_{53} - c_{78}$ | $c_{79} - c_{104}$ | $c_{105} - c_{130}$ | $c_{131} - c_{151}$ |
|----------------|-------------------|-------------------|--------------------|---------------------|---------------------|
| 0.297739       | 0.003845          | 0.009629          | 0.005631           | 0.000392            | 0.000049            |
| -1.022739      | -0.035819         | -0.004602         | -0.003553          | -0.000678           | 0.000161            |
| 1.679324       | 0.030644          | -0.004505         | -0.001360          | 0.000267            | -0.000172           |
| -1.596716      | -0.001044         | 0.009571          | 0.004997           | 0.000434            | 0.000004            |
| 0.765137       | -0.023706         | -0.006122         | -0.004551          | -0.000852           | 0.000176            |
| -0.004476      | 0.024538          | -0.002569         | 0.000697           | 0.000712            | -0.000195           |
| -0.083643      | -0.005207         | 0.008860          | 0.003222           | -0.000175           | 0.000017            |
| -0.370721      | -0.014308         | -0.007458         | -0.004191          | -0.000366           | 0.000213            |
| 0.815421       | 0.017712          | -0.000362         | 0.001797           | 0.000607            | -0.000287           |
| -0.840265      | -0.005930         | 0.007747          | 0.001777           | -0.000481           | 0.000104            |
| 0.484049       | -0.007539         | -0.008240         | -0.003636          | 0.000125            | 0.000251            |
| -0.092021      | 0.010429          | 0.001581          | 0.002548           | 0.000227            | -0.000550           |
| -0.055454      | -0.002033         | 0.006372          | 0.000213           | -0.000391           | 0.000591            |
| -0.047147      | -0.007683         | -0.008868         | -0.002244          | 0.000311            | -0.000347           |
| 0.203693       | 0.009095          | 0.003909          | 0.002049           | -0.000035           | -0.000020           |
| -0.227262      | -0.001736         | 0.004130          | -0.000050          | -0.000304           | 0.000284            |
| 0.097027       | -0.006776         | -0.008476         | -0.001967          | 0.000517            | -0.000290           |
| 0.060882       | 0.008109          | 0.005755          | 0.002408           | -0.000459           | 0.000060            |
| -0.119766      | -0.001110         | 0.001565          | -0.001072          | 0.000131            | 0.000223            |
| 0.060589       | -0.006878         | -0.007409         | -0.000922          | 0.000297            | -0.000362           |
| 0.038153       | 0.007825          | 0.007148          | 0.002118           | -0.000578           | 0.000268            |
| -0.084632      | -0.000915         | -0.001466         | -0.001836          | 0.000550            |                     |
| 0.051203       | -0.007376         | -0.004626         | 0.000564           | -0.000239           |                     |
| 0.016963       | 0.009298          | 0.006315          | 0.000623           | -0.000145           |                     |
| -0.056652      | -0.002861         | -0.002693         | -0.000947          | 0.000359            |                     |
| 0.041808       | -0.006133         | -0.002860         | 0.000393           | -0.000295           |                     |
